# Supplementary material
Source: Springer Nature journal article supplement (https://www.springermedizin.de/resource/supplementary/13058_2012_3202_MOESM6_ESM.pdf/9703502)

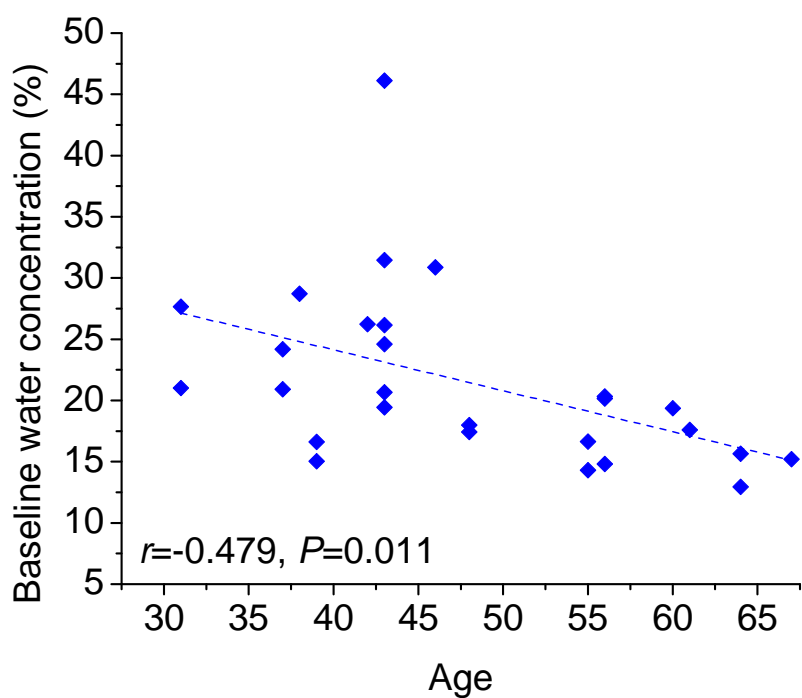

Supplement: MOESM6 [file 9703502]
